# Supplementary material
Source: HighWire-hosted journal article supplement (https://rc.rcjournal.com/highwire/filestream/21594/field_highwire_adjunct_files/0/circuit_compensation.pdf)
Supplement: circuit_compensation.pdf [file circuit_compensation.pdf]

# The Effect of Patient Circuit Compensation for Different Ventilator Modes

Ping-Hui Liu and Robert L. Chatburn

Respiratory Institute, Cleveland Clinic, Cleveland, OH

## Background

A key element of lung-protective ventilation is to control tidal volume within 4–8 mL/kg of predicted body weight.<sup>1,2</sup> In volume-targeted modes, a portion of tidal volume is lost due to compression in the patient circuit.

Many critical care ventilators provide patient circuit compensation to counteract the loss of volume in ventilator circuits based on circuit compliance (C).<sup>3,4</sup>

The purpose of the study was to assess how inspiratory effort affects volume delivery with or without circuit compensation.

## Methods

The IngMar Active Servo Lung 5000 (ASL 5000) was programmed to simulate an adult patient with moderate ARDS and different inspiratory efforts (Table 1).<sup>5,6</sup>

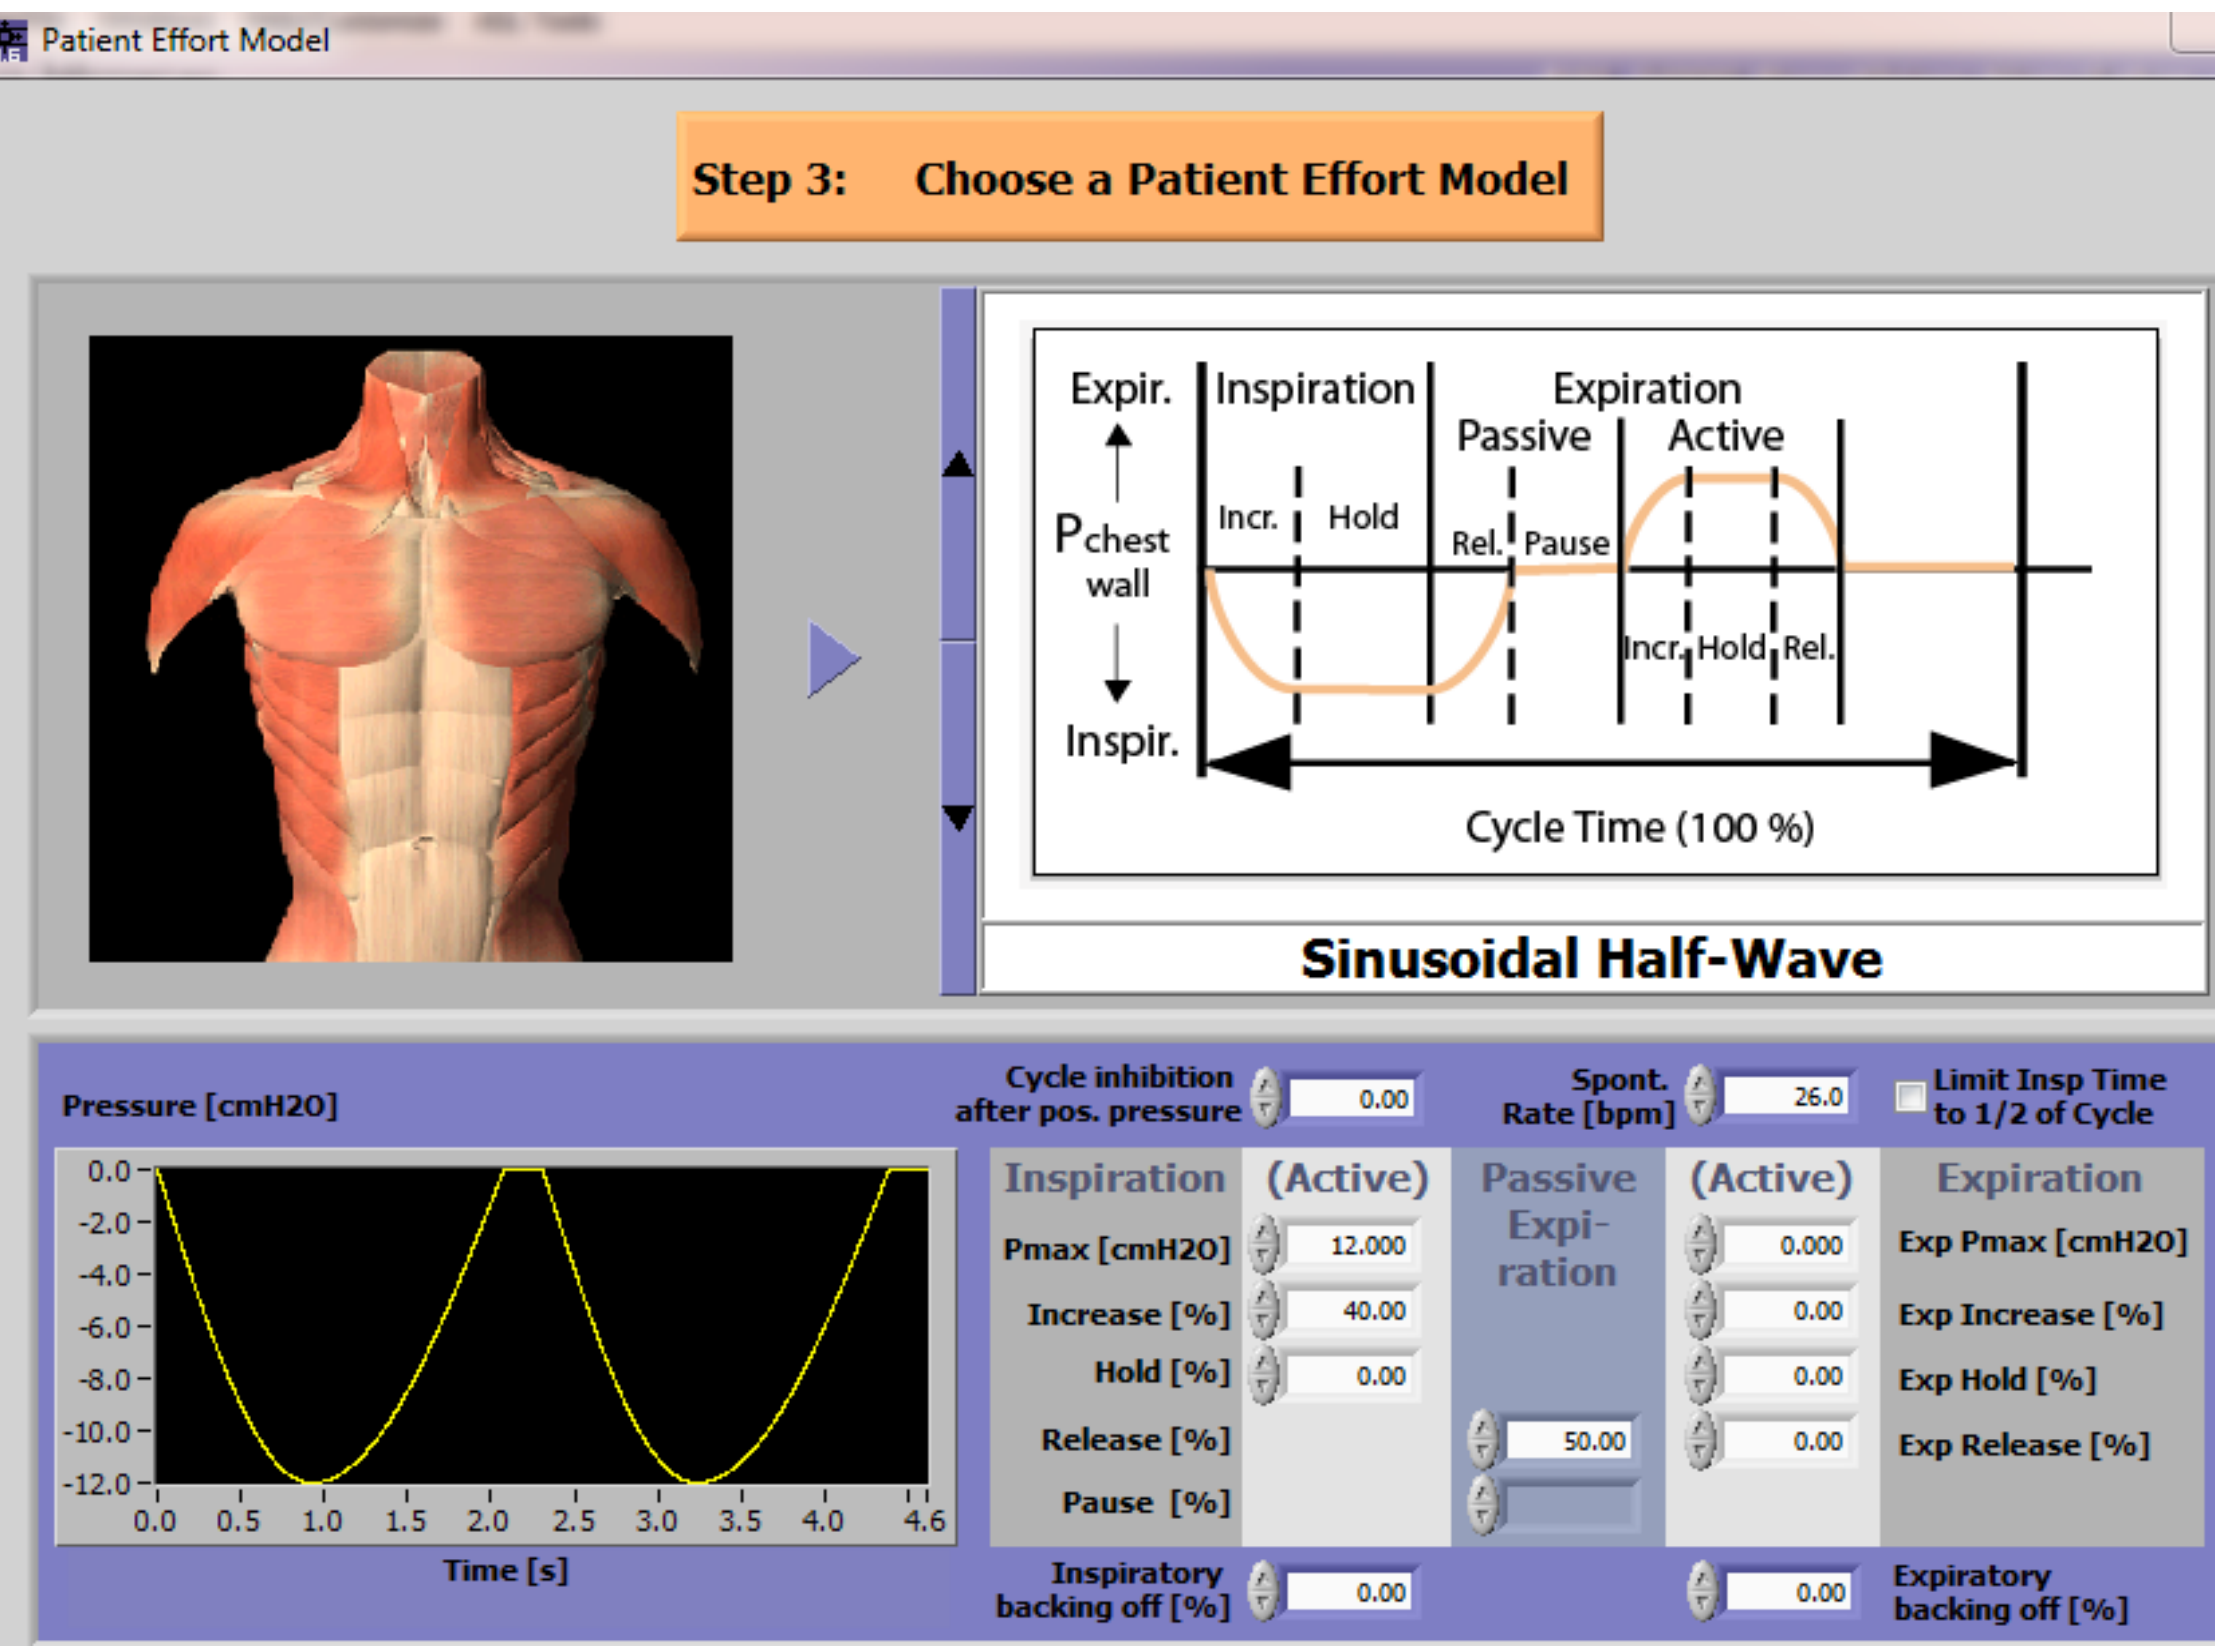

Table 1. Simulation parameters. R<sub>insp</sub> = inspiratory resistance, R<sub>exp</sub> = expiratory resistance, C = compliance, P<sub>max</sub> = maximum value of the muscle pressure waveform. .

### LUNG MODEL

|                                                            |    |
|------------------------------------------------------------|----|
| R <sub>insp</sub> (cm H <sub>2</sub> O-s-L <sup>-1</sup> ) | 10 |
| R <sub>exp</sub> (cm H <sub>2</sub> O-s-L <sup>-1</sup> )  | 10 |
| C (mL-cm H <sub>2</sub> O <sup>-1</sup> )                  | 40 |

### EFFORT MODEL

|                         |           |
|-------------------------|-----------|
| Frequency (breaths/min) | 20        |
| P <sub>max</sub>        | 0,5,10,15 |
| Increase                | 27%       |
| Hold                    | 0%        |
| Release                 | 20%       |
| Pause                   | 0%        |

Two modes were used on a Servo-U ventilator: volume-controlled continuous mandatory ventilation with set-point targeting scheme (VC-CMV) and pressure-controlled continuous mandatory ventilation with adaptive targeting scheme (PC-CMV).<sup>7</sup>

The outcome variable was the difference between tidal volume with and without circuit compensation for each inspiratory effort ( $\Delta V$ ). We recorded the mean of inspired tidal volume as measured and analyzed by the ASL 5000 for 10 breaths after stabilization.

## Results

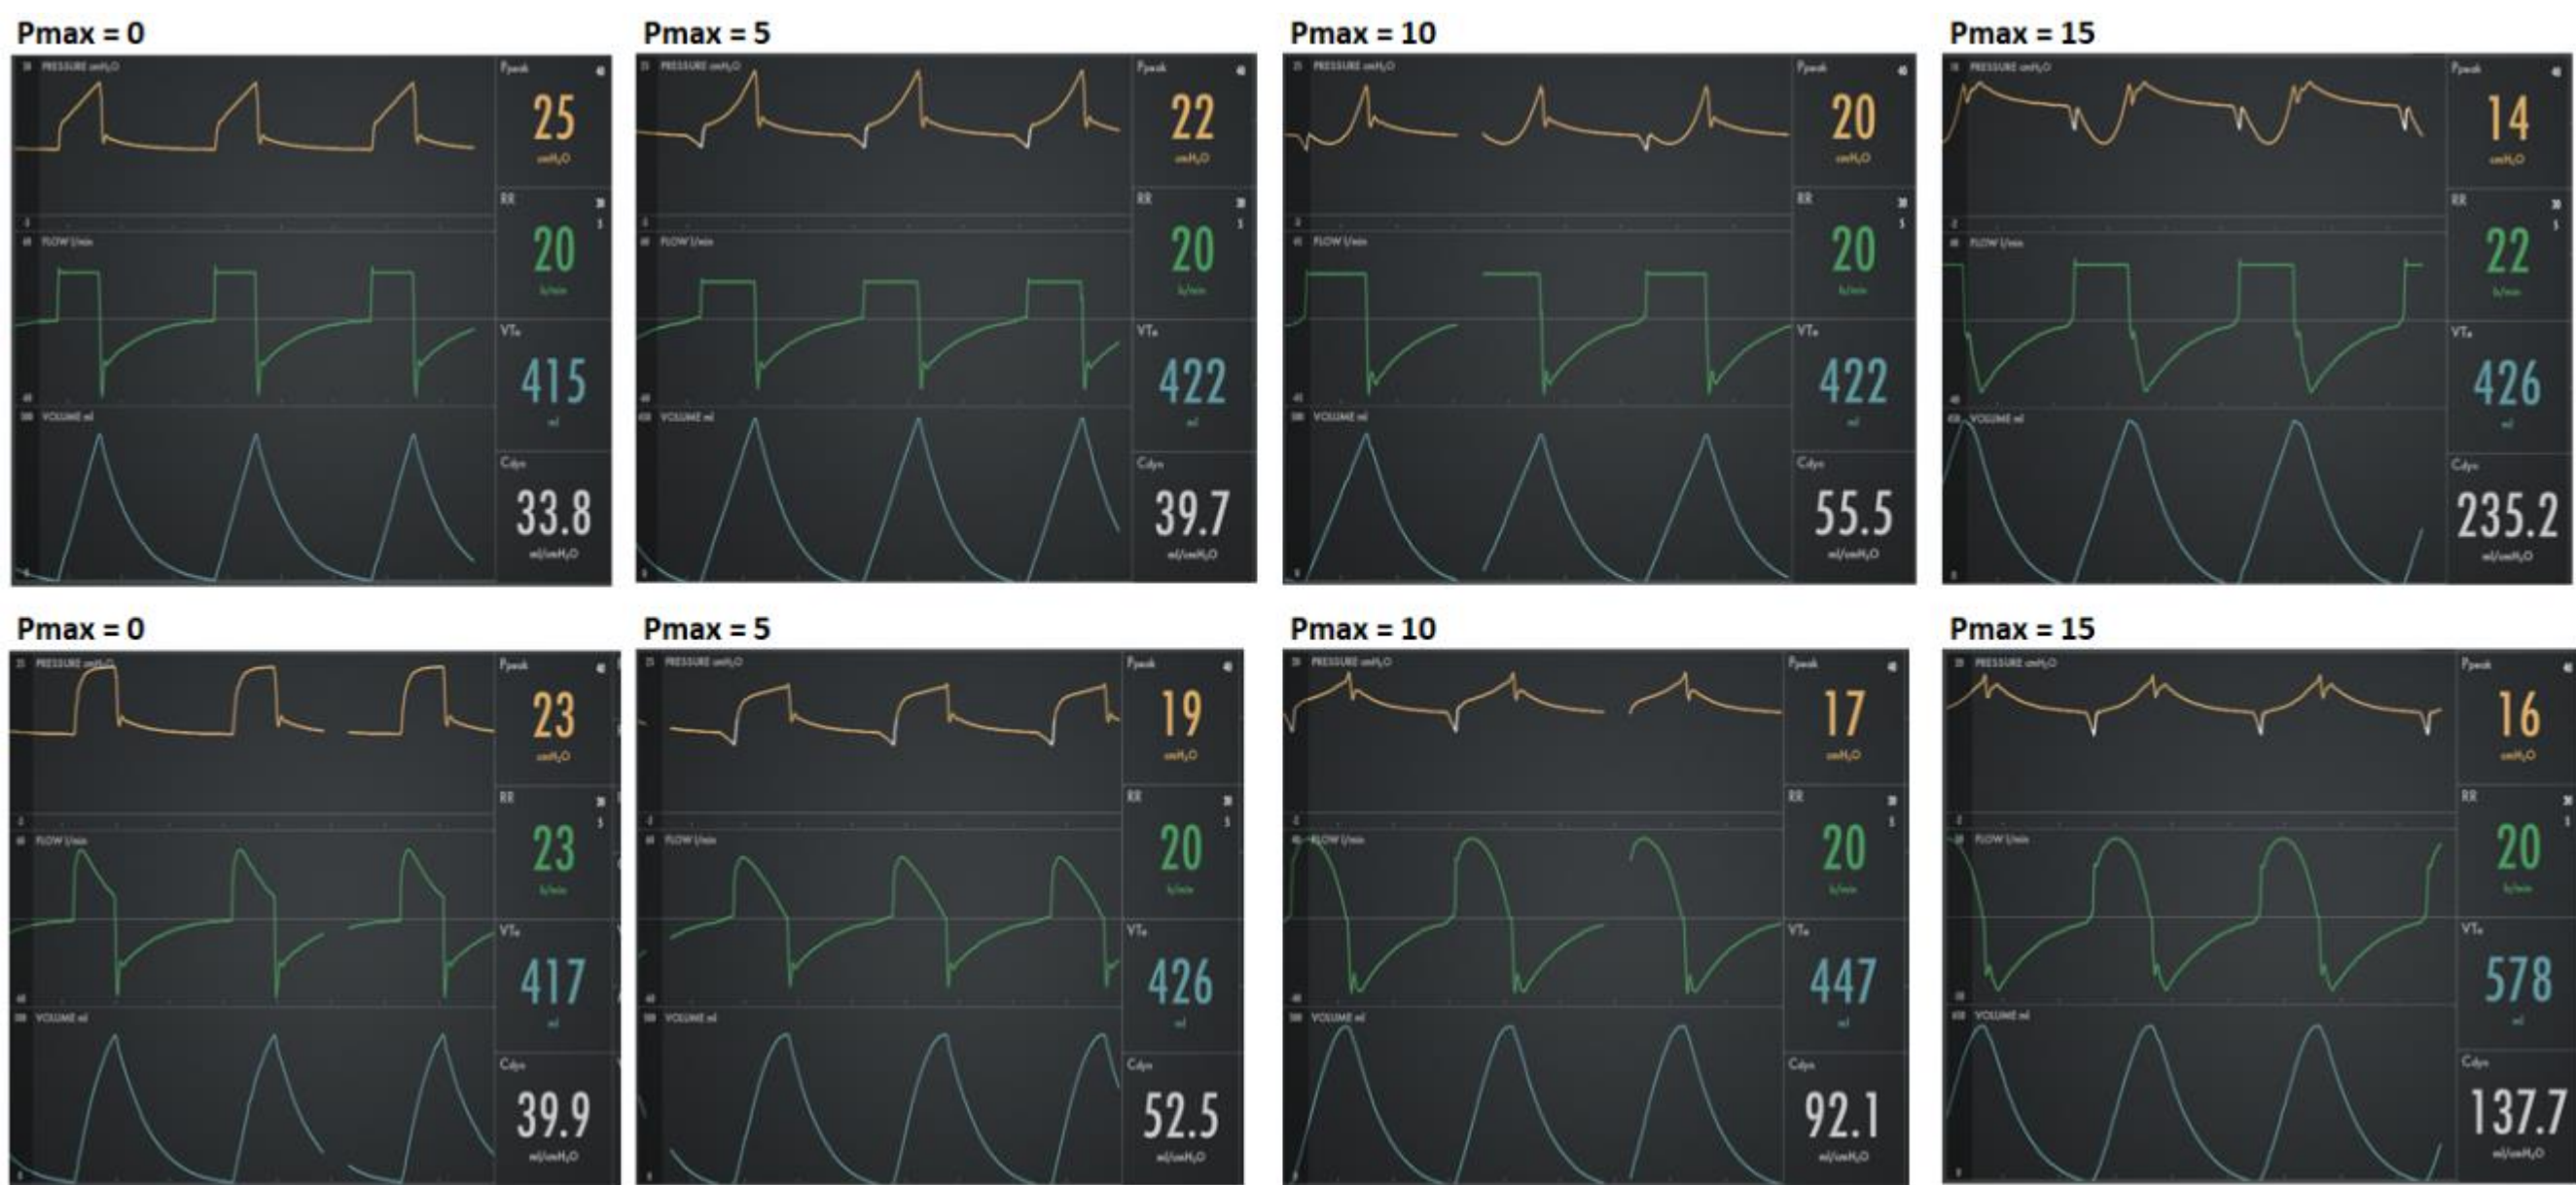

Figure 1. Pressure, volume, and flow waveforms with different levels of inspiratory effort, simulated as P<sub>max</sub> (cm H<sub>2</sub>O). The top row is VC-CMV and the bottom row is PC-CMV.

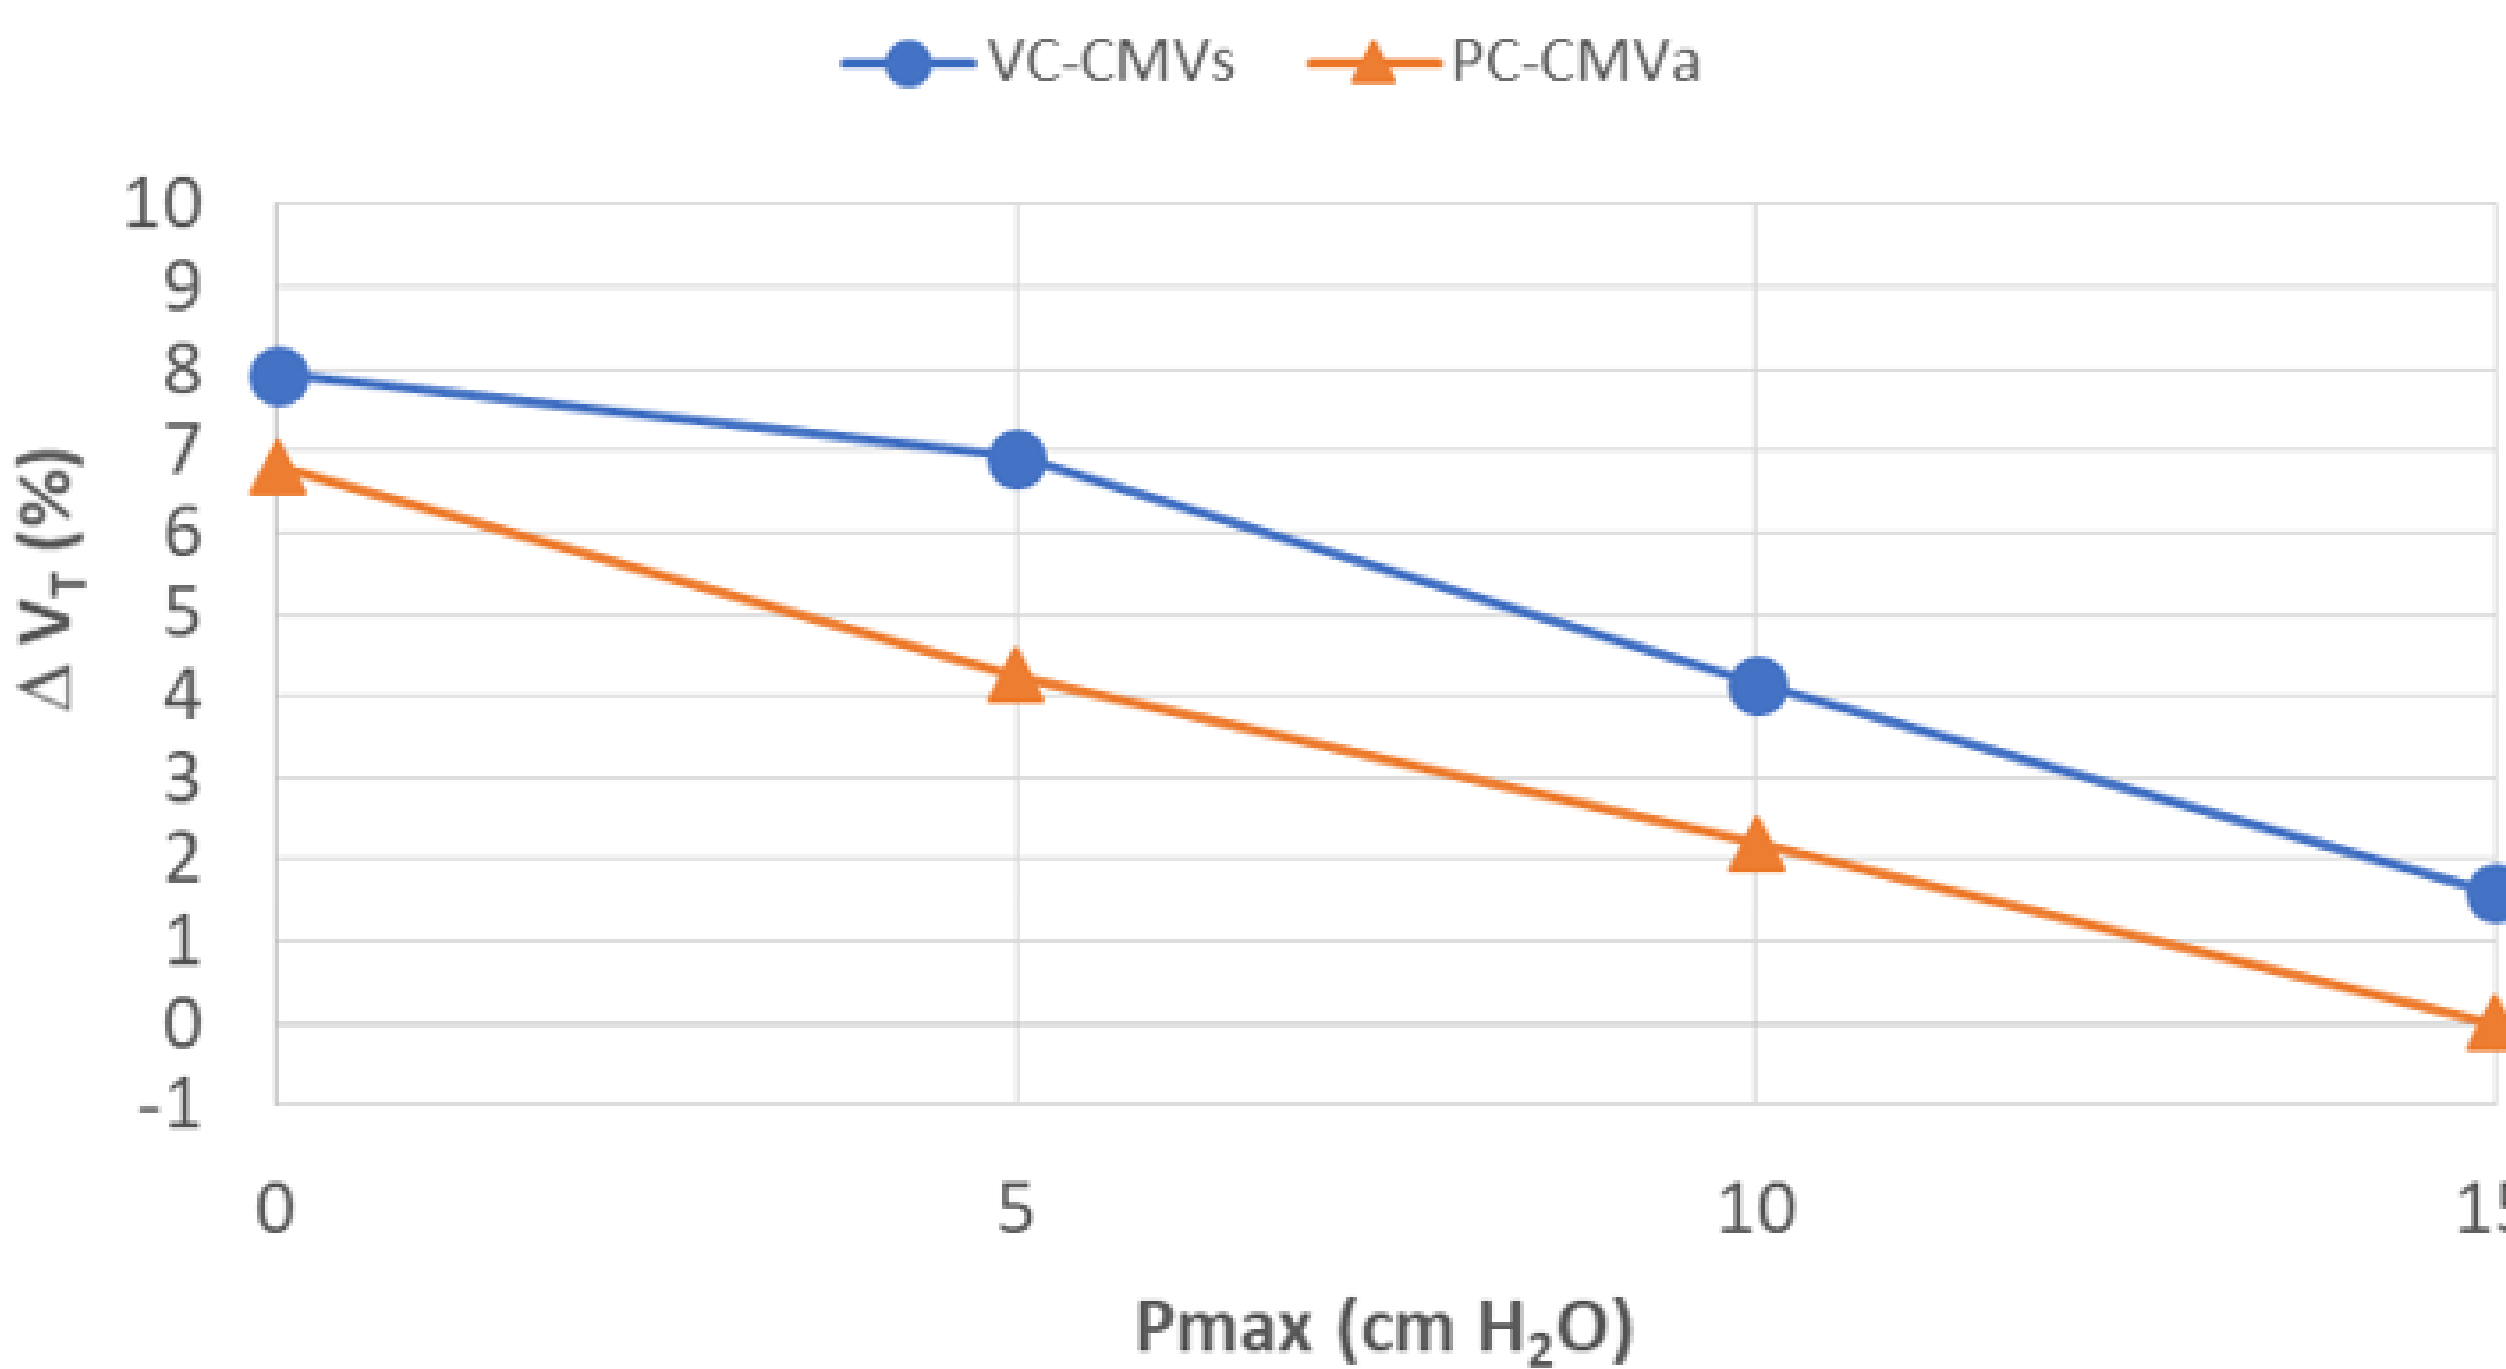

Figure 2. Patient Inspiratory tidal volume difference between with circuit compensation and without circuit compensation.

## Conclusions

The effects of circuit compensation are affected by the simulated inspiratory effort, as expected. For volume-targeted modes, increasing effort decreases P. Decreasing P decreases  $\Delta V$ .

## References

1. Acute Respiratory Distress Syndrome Network, Brower RG, Matthay MA, et al. Ventilation with lower tidal volumes as compared with traditional tidal volumes for acute lung injury and the acute respiratory distress syndrome. N Engl J Med. 2000;342(18):1301-1308.
2. Papazian L, Aubron C, Brochard L, et al. Formal guidelines: management of acute respiratory distress syndrome. Ann Intensive Care. 2019;9(1):69.
3. Masselli GMP, Silvestri S, Sciuto SA, Cappa P. Circuit compliance compensation in lung protective ventilation. Conf Proc Annu Int Conf IEEE Eng Med Biol Soc IEEE Eng Med Biol Soc Annu Conf. 2006;2006:5603-5606.
4. Glenski TA, Diehl C, Clopton RG, Friesen RH. Breathing circuit compliance and accuracy of displayed tidal volume during pressure-controlled ventilation of infants: A quality improvement project. Paediatr Anaesth. 2017;27(9):935-941.
5. Arnal J-M, Garnero A, Saoli M, Chatburn RL. Parameters for Simulation of Adult Subjects During Mechanical Ventilation. Respir Care. 2018;63(2):158-168.
6. Kondili E, Alexopoulou C, Xirouchaki N, Vaporidi K, Georgopoulos D. Estimation of inspiratory muscle pressure in critically ill patients. Intensive Care Med. 2010;36(4):648-655.
7. Chatburn RL, El-Khatib M, Mireles-Cabodevila E. A taxonomy for mechanical ventilation: 10 fundamental maxims. Respir Care. 2014;59(11):1747-1763.

## Disclosure

Mr. Chatburn is a consultant for IngMar Medical Inc, Vyair Medical Inc., and Promedic Consulting LLC.
